# Supplementary material for: A novel class of oligomeric and polymeric d10 metal complexes of asymmetrical N-heterocyclic ligand with strong π-stacking and hydrogen bonding: syntheses, structures, and photoluminescence
Source: Royal Society of Chemistry journal article supplement (doi:10.1039/c1ce05890h), 2011-01-01
Supplement: c1ce05890h.pdf [file c1ce05890h.pdf]

### Supplementary Information

## A novel class of oligomeric and polymeric $d^{10}$ metal complexes of asymmetrical N-heterocyclic ligand with strong $\pi$ stacking and hydrogen bonding, syntheses, structures and photoluminescence

Wang Jing-lin, Liu Bin and Yang Bin-sheng \*

Key Laboratory of Chemical Biology and Molecular Engineering of the Ministry of Education, Institute of Molecular Science, Shanxi University, Taiyuan, Shanxi 030006, People's Republic of China

Correspondence e-mail: [yangbs@sxu.edu.cn](mailto:yangbs@sxu.edu.cn)

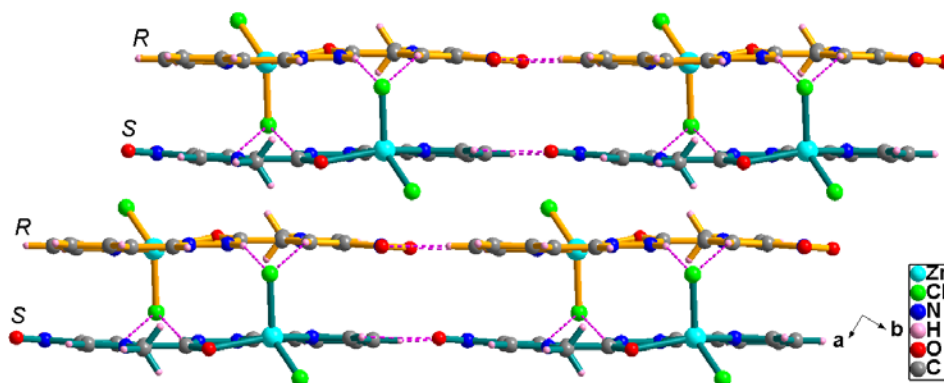

**Figure S1.** In  $ab$  plane, the 2-D sheet of alternating chirality is composed of 1-D chains for **2**.

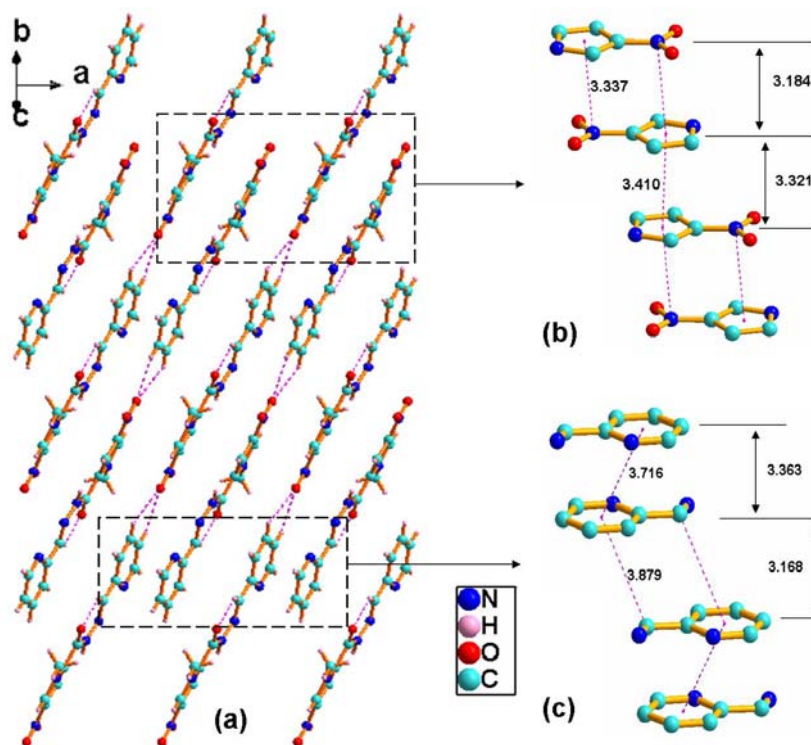

**Figure S2.** Showing the offset face-to-face  $\pi$ ... $\pi$  stacking interactions between ligands moieties of **3** in (011) plane (all distances in Å). Hydrogen-bonding interactions are represented by pink dashed lines.

**Table S1.** Selected bond lengths (Å) and bond angles (deg) for compounds **1–5**

| <b>1</b>                        |            |                                               |            |                                 |            |
|---------------------------------|------------|-----------------------------------------------|------------|---------------------------------|------------|
| N(1)-C(1)                       | 1.271(2)   | O(1)-C(7)                                     | 1.218(2)   | C(1)-C(2)                       | 1.465(3)   |
| N(1)-N(2)                       | 1.370(2)   | N(2)-C(7)                                     | 1.355(2)   | C(7)-C(8)                       | 1.475(3)   |
| C(1)-N(1)-N(2)                  | 116.30(16) | O(1)-C(7)-C(8)                                | 122.76(18) | N(1)-C(1)-C(2)                  | 119.21(18) |
| C(7)-N(2)-N(1)                  | 118.27(16) | O(1)-C(7)-N(2)                                | 123.22(18) | C(9)-C(8)-C(7)                  | 130.37(17) |
| <b>2</b>                        |            |                                               |            |                                 |            |
| Zn(1)-N(2)                      | 2.110(3)   | Zn(1)-Cl(2)                                   | 2.2897(11) | N(1)-C(1)                       | 1.371(4)   |
| Zn(1)-N(5)                      | 2.153(3)   | Zn(1)-O(1)                                    | 2.336(2)   | N(2)-C(7)                       | 1.275(4)   |
| Zn(1)-Cl(1)                     | 2.2059(10) | N(1)-N(2)                                     | 1.359(3)   | O(1)-C(1)                       | 1.226(4)   |
| N(2)-Zn(1)-N(5)                 | 75.35(10)  | N(5)-Zn(1)-O(1)                               | 144.83(10) | C(1)-O(1)-Zn(1)                 | 113.2(2)   |
| N(2)-Zn(1)-Cl(1)                | 135.51(8)  | Cl(1)-Zn(1)-O(1)                              | 97.34(7)   | N(2)-N(1)-C(1)                  | 115.0(3)   |
| N(5)-Zn(1)-Cl(1)                | 100.89(8)  | Cl(2)-Zn(1)-O(1)                              | 93.50(8)   | C(7)-N(2)-N(1)                  | 122.3(3)   |
| N(2)-Zn(1)-Cl(2)                | 106.00(8)  | C(7)-N(2)-Zn(1)                               | 118.3(2)   | O(1)-C(1)-N(1)                  | 120.5(3)   |
| N(5)-Zn(1)-Cl(2)                | 104.09(8)  | N(1)-N(2)-Zn(1)                               | 119.2(2)   | O(1)-C(1)-C(2)                  | 125.3(3)   |
| Cl(1)-Zn(1)-Cl(2)               | 117.61(4)  | C(12)-N(5)-Zn(1)                              | 127.7(2)   | N(2)-C(7)-C(8)                  | 116.4(3)   |
| N(2)-Zn(1)-O(1)                 | 70.56(10)  | C(8)-N(5)-Zn(1)                               | 114.6(2)   |                                 |            |
| <b>3</b>                        |            |                                               |            |                                 |            |
| Cd(1)-N(1)                      | 2.322(3)   | Cd(1)-Cl(1)                                   | 2.7077(10) | N(2)-C(6)                       | 1.274(4)   |
| Cd(1)-N(2)                      | 2.411(3)   | Cd(1)-Cl(2) <sup>ii</sup>                     | 2.7898(10) | N(2)-N(3)                       | 1.360(4)   |
| Cd(1)-Cl(1) <sup>i</sup>        | 2.5276(9)  | Cl(1)-Cd(1) <sup>i</sup>                      | 2.5276(9)  | N(3)-C(7)                       | 1.377(5)   |
| Cd(1)-Cl(2)                     | 2.5716(9)  | Cl(2)-Cd(1) <sup>ii</sup>                     | 2.7898(10) | O(1)-C(7)                       | 1.218(4)   |
| N(1)-Cd(1)-N(2)                 | 69.09(10)  | Cl(1) <sup>i</sup> -Cd(1)-Cl(1)               | 84.14(3)   | Cd(1) <sup>i</sup> -Cl(1)-Cd(1) | 95.86(3)   |
| N(1)-Cd(1)-Cl(1) <sup>i</sup>   | 94.19(7)   | Cl(2)-Cd(1)-Cl(1)                             | 93.10(3)   | Cd(1)-Cl(2)-Cd(1) <sup>ii</sup> | 96.27(3)   |
| N(2)-Cd(1)-Cl(1) <sup>i</sup>   | 161.19(7)  | N(1)-Cd(1)-Cl(2) <sup>ii</sup>                | 84.01(7)   | C(1)-N(1)-Cd(1)                 | 123.1(2)   |
| N(1)-Cd(1)-Cl(2)                | 153.80(8)  | N(2)-Cd(1)-Cl(2) <sup>ii</sup>                | 89.43(7)   | C(5)-N(1)-Cd(1)                 | 118.4(2)   |
| N(2)-Cd(1)-Cl(2)                | 87.72(7)   | Cl(1) <sup>i</sup> -Cd(1)-Cl(2) <sup>ii</sup> | 97.57(3)   | C(6)-N(2)-N(3)                  | 125.0(3)   |
| Cl(1) <sup>i</sup> -Cd(1)-Cl(2) | 110.32(3)  | Cl(2)-Cd(1)-Cl(2) <sup>ii</sup>               | 83.73(3)   | C(6)-N(2)-Cd(1)                 | 117.5(2)   |
| N(1)-Cd(1)-Cl(1)                | 98.64(7)   | Cl(1)-Cd(1)-Cl(2) <sup>ii</sup>               | 176.76(3)  | N(3)-N(2)-Cd(1)                 | 117.4(2)   |
| N(2)-Cd(1)-Cl(1)                | 89.77(7)   |                                               |            |                                 |            |
| <b>4</b>                        |            |                                               |            |                                 |            |
| Hg(1)-Cl(1)                     | 2.347(6)   | Hg(2)-Cl(4)                                   | 2.351(6)   | N(3)-N(4)                       | 1.37(2)    |
| Hg(1)-Cl(2)                     | 2.348(6)   | Hg(2)-N(10)                                   | 2.465(17)  | N(4)-C(7)                       | 1.25(2)    |

|                   |           |                   |           |                   |           |
|-------------------|-----------|-------------------|-----------|-------------------|-----------|
| Hg(1)-N(4)        | 2.502(16) | Hg(2)-N(9)        | 2.488(16) | N(8)-C(13)        | 1.35(2)   |
| Hg(1)-N(5)        | 2.515(16) | Hg(2)-O(6)        | 2.708(15) | O(6)-C(13)        | 1.23(2)   |
| Hg(1)-O(3)        | 2.738(15) | N(3)-C(1)         | 1.34(2)   | N(8)-N(9)         | 1.38(2)   |
| Hg(2)-Cl(3)       | 2.350(7)  | O(3)-C(1)         | 1.22(2)   | N(9)-C(19)        | 1.26(2)   |
| Cl(1)-Hg(1)-Cl(2) | 149.2(2)  | Cl(3)-Hg(2)-Cl(4) | 152.3(2)  | C(7)-N(4)-Hg(1)   | 119.2(13) |
| Cl(1)-Hg(1)-N(4)  | 103.5(4)  | Cl(3)-Hg(2)-N(10) | 92.5(5)   | N(3)-N(4)-Hg(1)   | 119.8(12) |
| Cl(2)-Hg(1)-N(4)  | 104.5(4)  | Cl(4)-Hg(2)-N(10) | 110.8(5)  | C(8)-N(5)-Hg(1)   | 116.8(13) |
| Cl(1)-Hg(1)-N(5)  | 91.4(4)   | Cl(3)-Hg(2)-N(9)  | 99.6(4)   | C(12)-N(5)-Hg(1)  | 123.5(14) |
| Cl(2)-Hg(1)-N(5)  | 111.9(4)  | Cl(4)-Hg(2)-N(9)  | 103.4(4)  | C(19)-N(9)-Hg(2)  | 119.6(13) |
| N(4)-Hg(1)-N(5)   | 65.1(5)   | N(10)-Hg(2)-N(9)  | 65.9(5)   | N(8)-N(9)-Hg(2)   | 122.7(11) |
| Cl(1)-Hg(1)-O(3)  | 92.4(4)   | Cl(3)-Hg(2)-O(6)  | 91.2(4)   | C(20)-N(10)-Hg(2) | 117.5(12) |
| Cl(2)-Hg(1)-O(3)  | 90.4(4)   | Cl(4)-Hg(2)-O(6)  | 86.9(4)   | C(24)-N(10)-Hg(2) | 124.2(14) |
| N(4)-Hg(1)-O(3)   | 60.3(5)   | N(10)-Hg(2)-O(6)  | 126.1(5)  | C(1)-O(3)-Hg(1)   | 116.0(13) |
| N(5)-Hg(1)-O(3)   | 124.6(5)  | N(9)-Hg(2)-O(6)   | 60.5(5)   | C(13)-O(6)-Hg(2)  | 116.0(13) |

5

|                                              |            |                                              |            |                                              |            |
|----------------------------------------------|------------|----------------------------------------------|------------|----------------------------------------------|------------|
| K(1)-O(6) <sup>iii</sup>                     | 2.771(5)   | K(1)-O(3) <sup>iv</sup>                      | 2.878(4)   | K(1)-O(2) <sup>iv</sup>                      | 3.018(4)   |
| K(1)-O(1)                                    | 2.775(4)   | K(1)-N(5)                                    | 2.909(5)   | K(1)-O(4')                                   | 3.02(4)    |
| K(1)-O(5')                                   | 2.83(6)    | K(1)-O(4)                                    | 2.91(3)    | K(1)-O(5)                                    | 3.17(2)    |
| K(1)-N(2)                                    | 2.840(5)   |                                              |            |                                              |            |
| O(6) <sup>iii</sup> -K(1)-O(1)               | 87.33(14)  | N(2)-K(1)-O(4)                               | 87.8(8)    | N(5)-K(1)-O(5)                               | 123.4(5)   |
| O(6) <sup>iii</sup> -K(1)-N(2)               | 89.64(14)  | O(3) <sup>iv</sup> -K(1)-O(4)                | 100.4(6)   | O(4)-K(1)-O(5)                               | 42.4(6)    |
| O(1)-K(1)-N(2)                               | 56.97(12)  | N(5)-K(1)-O(4)                               | 86.6(6)    | O(2) <sup>iv</sup> -K(1)-O(5)                | 92.9(11)   |
| O(6) <sup>iii</sup> -K(1)-O(3) <sup>iv</sup> | 77.47(14)  | O(6) <sup>iii</sup> -K(1)-O(2) <sup>iv</sup> | 88.15(13)  | O(6) <sup>iii</sup> -K(1)-N(4) <sup>iv</sup> | 83.32(13)  |
| O(1)-K(1)-O(3) <sup>iv</sup>                 | 161.44(14) | O(1)-K(1)-O(2) <sup>iv</sup>                 | 127.09(12) | O(1)-K(1)-N(4) <sup>iv</sup>                 | 147.19(13) |
| N(2)-K(1)-O(3) <sup>iv</sup>                 | 132.37(13) | N(2)-K(1)-O(2) <sup>iv</sup>                 | 175.24(13) | N(2)-K(1)-N(4) <sup>iv</sup>                 | 153.65(13) |
| O(6) <sup>iii</sup> -K(1)-N(5)               | 87.55(14)  | O(3) <sup>iv</sup> -K(1)-O(2) <sup>iv</sup>  | 42.95(12)  | O(3) <sup>iv</sup> -K(1)-N(4) <sup>iv</sup>  | 21.30(11)  |
| O(1)-K(1)-N(5)                               | 114.03(13) | N(5)-K(1)-O(2) <sup>iv</sup>                 | 118.39(12) | N(5)-K(1)-N(4) <sup>iv</sup>                 | 96.96(13)  |
| N(2)-K(1)-N(5)                               | 57.27(13)  | O(4)-K(1)-O(2) <sup>iv</sup>                 | 94.0(8)    | O(4)-K(1)-N(4) <sup>iv</sup>                 | 96.7(8)    |
| O(3) <sup>iv</sup> -K(1)-N(5)                | 76.31(13)  | O(6) <sup>iii</sup> -K(1)-O(5)               | 143.0(4)   | O(2) <sup>iv</sup> -K(1)-N(4) <sup>iv</sup>  | 21.70(11)  |
| O(6) <sup>iii</sup> -K(1)-O(4)               | 174.1(6)   | N(2)-K(1)-O(5)                               | 91.4(11)   | O(5)-K(1)-N(4) <sup>iv</sup>                 | 109.3(11)  |
| O(1)-K(1)-O(4)                               | 95.7(6)    | O(3) <sup>iv</sup> -K(1)-O(5)                | 125.7(11)  |                                              |            |

Symmetry transformations used to generate equivalent atoms: i [-x, 1-y, 1-z]; ii [1-x, 1-y, 1-z];

iii [x, 3/2-y, -1/2+z]; iv [1+x, y, z].

**Table S2.** Shortest D...A distances (Å) and angles (deg) for **1–5**

| <i>D</i> -H  | <i>d</i> ( <i>D</i> -H) | <i>d</i> (H... <i>A</i> ) | ∠ <i>DHA</i> | <i>d</i> ( <i>D</i> ... <i>A</i> ) | <i>A</i>                   |
|--------------|-------------------------|---------------------------|--------------|------------------------------------|----------------------------|
| <b>1</b>     |                         |                           |              |                                    |                            |
| C(12)–H(12B) | 0.960                   | 2.566                     | 95.19        | 2.819                              | O(1)                       |
| C(12)–H(12C) | 0.960                   | 2.648                     | 90.20        | 2.819                              | O(1)                       |
| C(4)–H(4)    | 0.930                   | 2.574                     | 172.01       | 3.498                              | O2[1+x, y, 1+z]            |
| C(11)–H(11)  | 0.930                   | 2.558                     | 149.98       | 3.395                              | O2[-x, -y, -z]             |
| C(6)–H(6)    | 0.930                   | 2.655                     | 169.19       | 3.573                              | O3[2-x, 2-y, 1-z]          |
| N(2)–H(2)    | 0.860                   | 2.046                     | 154.69       | 2.847                              | O(4)                       |
| O(4)–H(4A)   | 0.850                   | 2.013                     | 178.84       | 2.863                              | N(3) [2-x, 2-y, 1-z]       |
| O(4)–H(4B)   | 0.850                   | 2.276                     | 146.51       | 3.021                              | O(1) [1-x, 1-y, 1-z]       |
| O(4)–H(4B)   | 0.850                   | 2.500                     | 129.89       | 3.114                              | O(1) [ x, 1+y, z ]         |
| C(9)–H(9)    | 0.930                   | 2.463                     | 149.03       | 3.295                              | O(4)                       |
| C(1)–H(1)    | 0.930                   | 2.597                     | 135.37       | 3.324                              | O(4)                       |
| <b>2</b>     |                         |                           |              |                                    |                            |
| N(1)–H(1)    | 0.860                   | 2.420                     | 156.19       | 3.227                              | Cl(2) [ -x, 2-y, -z ]      |
| C(3)–H(3)    | 0.930                   | 2.760                     | 150.46       | 3.598                              | Cl(2) [ -x, 2-y, -z ]      |
| C(9)–H(9)    | 0.930                   | 2.708                     | 163.45       | 3.609                              | Cl(1) [x, 1.5-y, -0.5+z]   |
| C(11)–H(11)  | 0.930                   | 2.472                     | 167.16       | 3.385                              | O(3) [-1+x, -1+y, z]       |
| C(12)–H(12)  | 0.930                   | 2.804                     | 132.34       | 3.499                              | O(2) [-1+x, -1+y, z]       |
| <b>3</b>     |                         |                           |              |                                    |                            |
| C(6)–H(6)    | 0.930                   | 2.261                     | 121.87       | 2.863                              | O(1)                       |
| N(3)–H(3)    | 0.860                   | 2.528                     | 142.08       | 3.250                              | Cl(2)                      |
| C(11)–H(11)  | 0.930                   | 2.876                     | 162.55       | 3.774                              | Cl(1)[1-x, 1-y, -z]        |
| C(3)–H(3A)   | 0.930                   | 2.674                     | 149.30       | 3.506                              | Cl(1)[-x, -y, 1-z]         |
| C(3)–H(3A)   | 0.930                   | 2.661                     | 123.85       | 3.271                              | O(2)[1+x, 1+y, -1+z]       |
| C(2)–H(2)    | 0.930                   | 2.676                     | 122.71       | 3.273                              | O(2)[1+x, 1+y, -1+z]       |
| <b>4</b>     |                         |                           |              |                                    |                            |
| N(3)–H(3)    | 0.860                   | 1.968                     | 163.88       | 2.805                              | O(8) [1+x, y, z]           |
| C(3)–H(3A)   | 0.930                   | 2.332                     | 152.04       | 3.184                              | O(8) [1+x, y, z]           |
| C(10)–H(10)  | 0.930                   | 2.417                     | 139.84       | 3.180                              | O(1) [x, y, -1+z]          |
| N(8)–H(8)    | 0.860                   | 1.943                     | 168.17       | 2.788                              | O(7) [1+x, y, z]           |
| C(15)–H(15)  | 0.930                   | 2.353                     | 152.08       | 3.204                              | O(7) [1+x, y, z]           |
| C(26)–H(26C) | 0.930                   | 2.801                     | 163.33       | 3.731                              | Cl(4)                      |
| C(21)–H(21)  | 0.930                   | 2.775                     | 161.64       | 3.670                              | Cl(3) [ 2-x, 1-y, 1-z ]    |
| C(22)–H(22)  | 0.930                   | 2.483                     | 143.14       | 3.278                              | O(4) [ x, y, -1+z ]        |
| C(7)–H(7)    | 0.930                   | 3.035                     | 140.43       | 3.798                              | Cl(1) [1-x, -y, -z]        |
| C(9)–H(9)    | 0.930                   | 2.949                     | 149.43       | 3.780                              | Cl(1) [1-x, -y, -z]        |
| <b>5</b>     |                         |                           |              |                                    |                            |
| N(1)–H(1)    | 0.860                   | 2.322                     | 143.52       | 3.057                              | O(6) [1-x, -1/2+y, 3/2-z]  |
| N(1)–H(1)    | 0.860                   | 2.416                     | 157.39       | 3.233                              | O(5A) [1-x, -1/2+y, 3/2-z] |

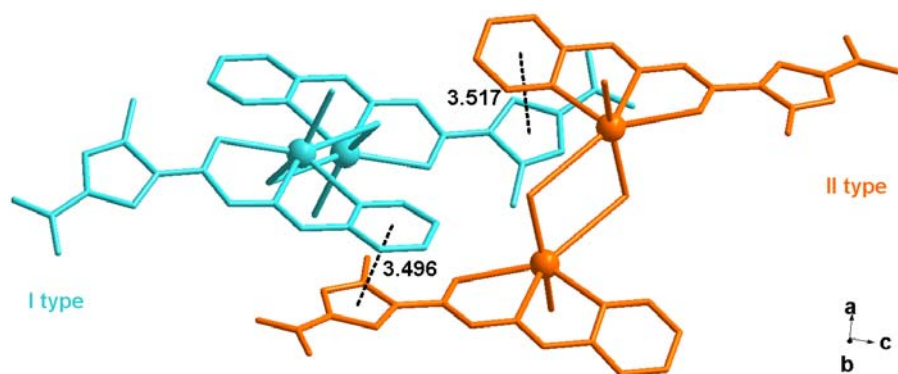

**Figure S3.** The  $\pi\cdots\pi$  interactions between the **I** and **II** type molecule for **4**

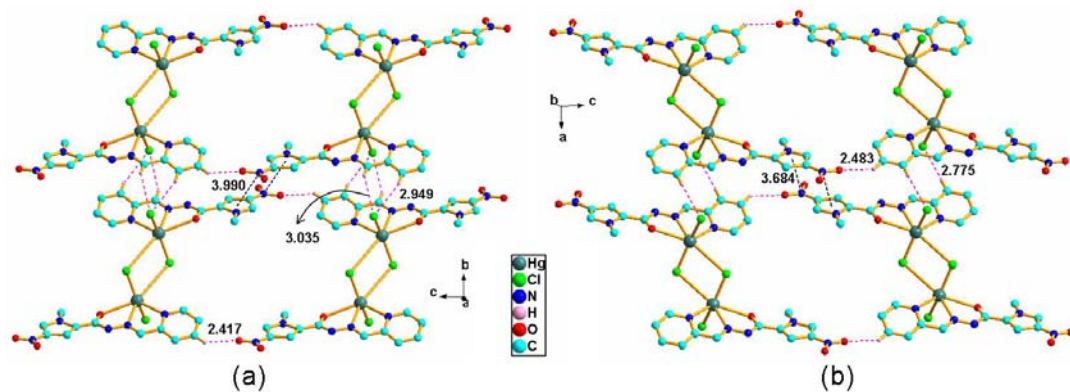

**Figure S4.** 1-D chains are assembled through H-bonding and  $\pi\cdots\pi$  interactions to 2-D network in *bc* plane for **I** type molecule (a) and in *ac* plane for **II** type molecule (b) (all distances in Å). The N,N-Dimethylformamide solvent molecules and H atoms not involved in hydrogen bonds have been omitted for clarity.

The 1-D chains of **I** type molecule (*b*-axis direction) are assembled by intermolecular H-bonds C(10)-H(10)...O(1)(*x*, *y*, -1+*z*) of 2.417 Å and weak  $\pi\cdots\pi$  interactions (nitro) N(2)...(pyrrolyl) centroid(1-*x*, -*y*, 1-*z*) of 3.990 Å to form 2-D sheets of parallel staircases in *bc* plane. However, 1-D chains of **II** type molecule (*a*-axis direction) formed 2-D sheets in *bc* plane with stronger  $\pi\cdots\pi$  interactions.

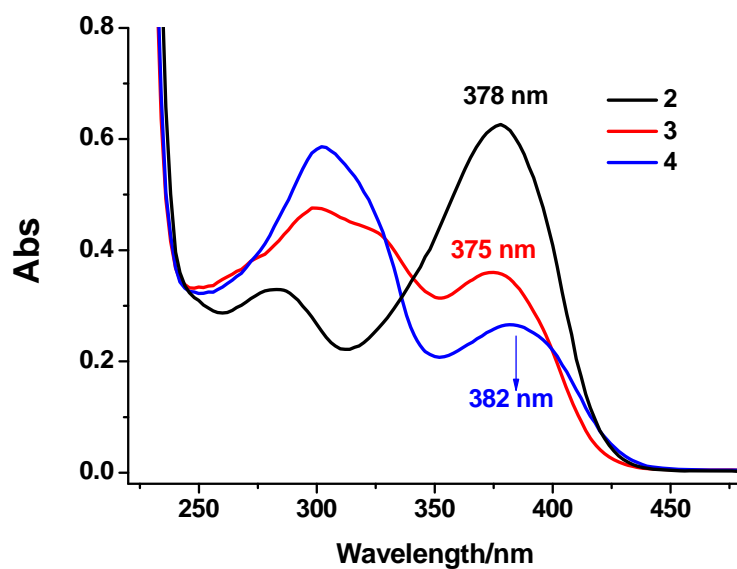

**Figure S5.** The UV spectra from MeOH solutions of the pure complexes **2-4** ( $[M^{2+}] = 2.0 \times 10^{-5} M$ ).

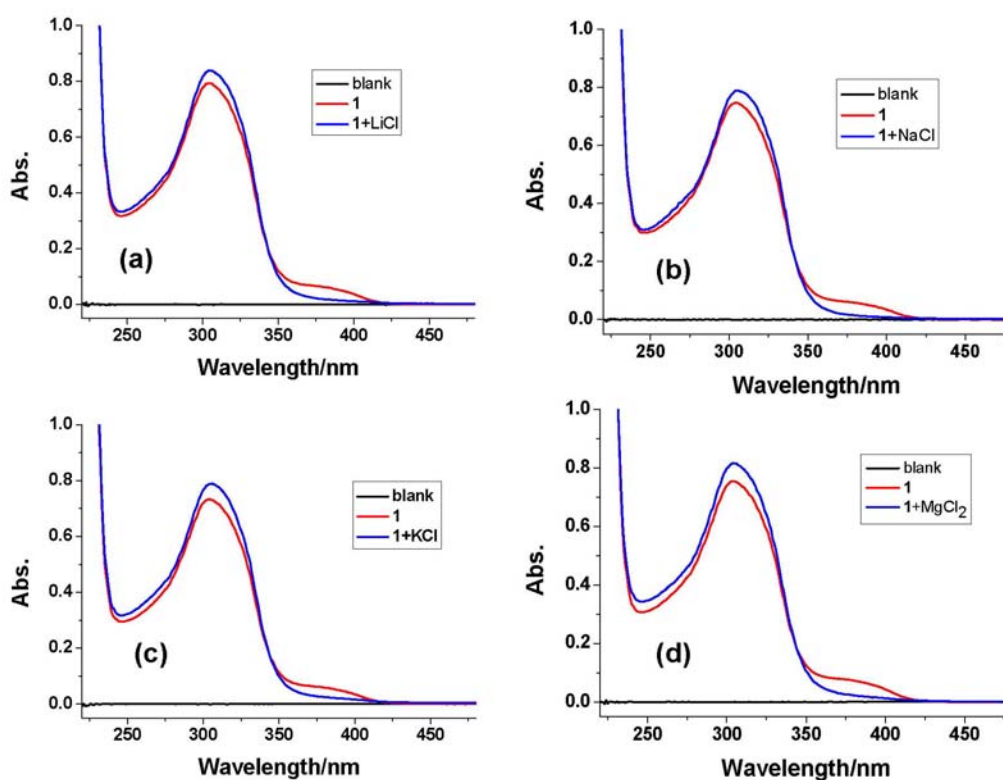

**Figure S6.** The variation of spectra upon addition of a small quantity solids of LiCl(a), NaCl(b), KCl(c), and MgCl<sub>2</sub>(d) to the MeOH solution of **1** ( $1.4 \times 10^{-5} M$ ) at 25 °C.

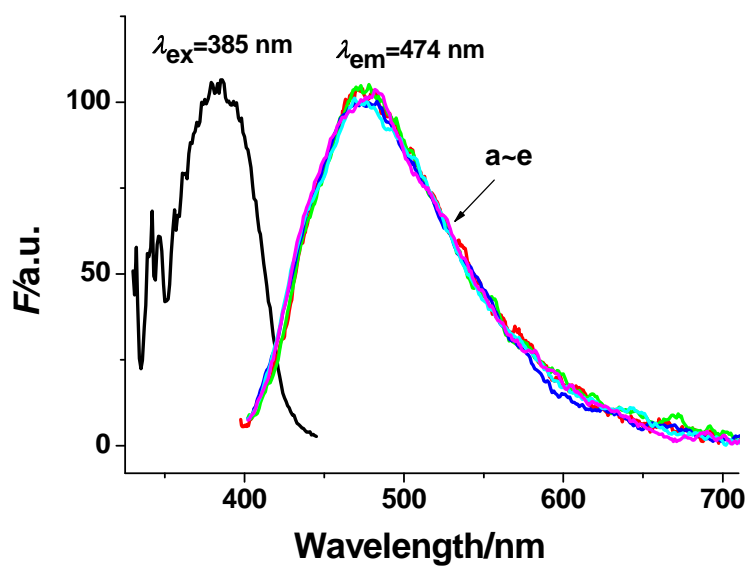

**Figure S7.** The fluorescence spectra upon addition of  $KNO_3$  to the MeOH solution of **1** ( $1.1 \times 10^{-5}$  M) at 25 °C, slit width, 5 nm.
